# Supplementary material for: Mechanisms other than activation of the iron regulon account for the hyper-resistance to cobalt of a Saccharomyces cerevisiae strain obtained by evolutionary engineering
Source: Royal Society of Chemistry journal article supplement (doi:10.1039/c3mt00107e), 2013-01-01
Supplement: c3mt00107e.pdf [file c3mt00107e.pdf]

Fig.S1 (Alkim *et al.*)

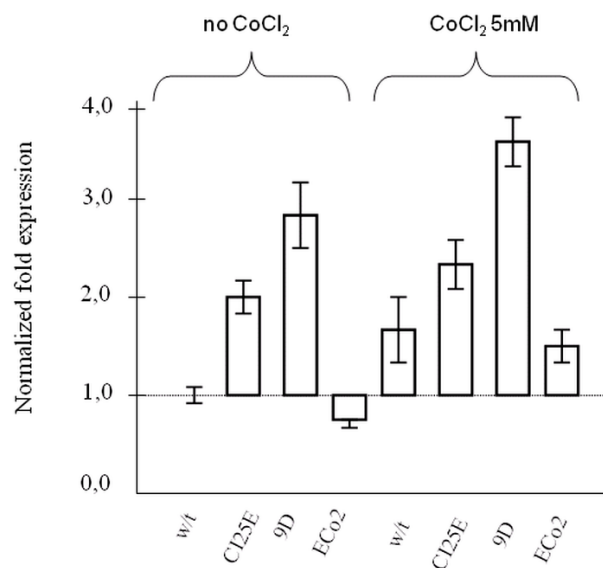

**Figure S1:** Validation by qRT-PCR of transcriptional increase of *COT1* in the evolved CI25E strains. Yeast cells were cultivated in SD medium in the absence up to 0.5-0.6 OD<sub>600</sub>. Cobalt was added to part of the culture at 2 mM final concentration. After 1 h of incubation, samples were taken for RNA extraction. The extraction was performed using the SV Total RNA Isolation System (Promega). RT-PCR experiment was performed by using IQ™ SYBR® Green Supermix (*BIO-RAD*) kit. Use of reference genes and quantification of the transcript levels were done as described in <sup>62</sup>.

Fig. S2 (Alkim *et al.*)

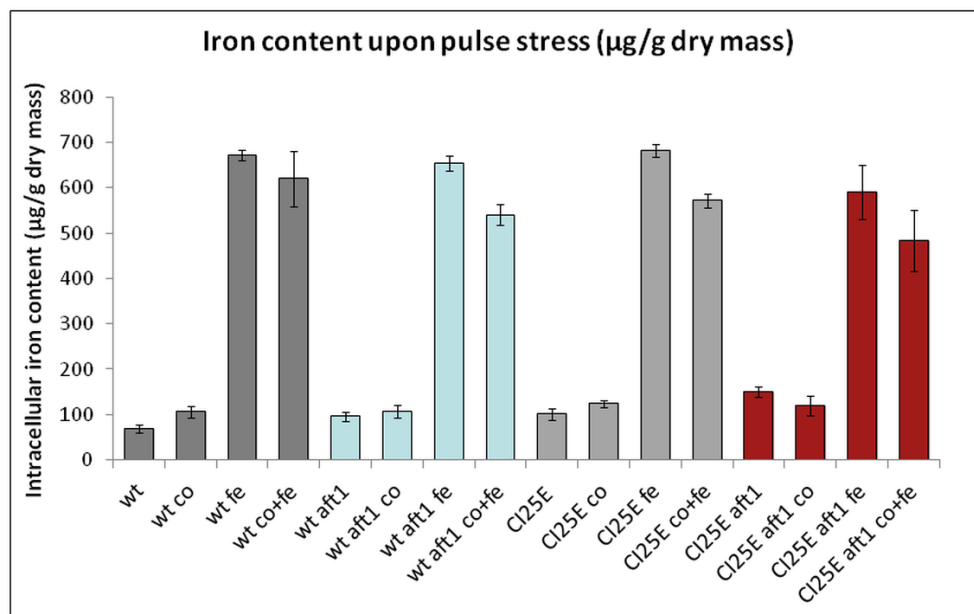

**Figure S2:** Intracellular levels of iron and cobalt ions in wild type CEN.PK 113.7 and evolved CI25E strain, bearing *AFT1* or deleted for this gene upon cobalt or iron stress.

Strains CEN.PK 113.7D *AFT1*, CEN.PK 113.7D *aft1* $\Delta$ , CI25E *AFT1* and CI25E *aft1* $\Delta$  were cultivated in SD medium to mid logarithmic phase ( $OD_{600} = 1$  unit). At this time, the cultures were divided into 4 parts, to which  $CoCl_2$  (2mM),  $(NH_4)_2Fe(SO_4)_2 \cdot 6H_2O$  (2mM) or both ions at 2 mM were added to each of them. After 90 min incubation, samples were taken for metal ions measurement as described in Material and Methods. The results shown are the mean  $\pm$  SEM of three independent experiments.

**Table S1:** List of oligonucleotides designed for gene deletion, gene sequencing, and RT-PCR analysis

| name                                               | Primer sequences for deletion                                           | additional description                                                                                     |
|----------------------------------------------------|-------------------------------------------------------------------------|------------------------------------------------------------------------------------------------------------|
| aft1::KANMX4_for                                   | TCGGTGCATTGACAACCTC                                                     |                                                                                                            |
| aft1::KANMX4_rev                                   | AGCACTACTATTACACCAG                                                     |                                                                                                            |
| aft1_verification_fi                               | CGCGAGATCCTAATAACCAAAC                                                  |                                                                                                            |
| aft2::KANMX4_for                                   | CCTCAGTTTACTTTATACAAAG                                                  |                                                                                                            |
| aft2::KANMX4_rev                                   | CGTGAACCATATTATAATCAACA                                                 |                                                                                                            |
| aft2_verification_fi                               | TTAGAAATTTCAATAGCAAGTACT                                                |                                                                                                            |
| cot1::KANMX4_for                                   | TATAGCAATTGCTGCGGAC                                                     |                                                                                                            |
| cot1::KANMX4_rev                                   | TGCAAGACTATTGCTATTATATTA                                                |                                                                                                            |
| cot1_verification_r                                | TTCCAGTAAACTCTTCAATT                                                    |                                                                                                            |
| cot1::NATMX_for                                    | catagctatagaagaagttacacaaagtcaggaagattgagtaaatCAGTATAGCGACCAGCAT        | The sites for the NATMX marker are shown in upper case and homologous recombination regions in lower case. |
| cot1::NATMX_rev                                    | taccgtataacgatttttaaaagtatttaattcttcacgcttttctgataaagtcctGACATGGAGGCCAC | The sites for the NATMX marker are shown in upper case and homologous recombination regions in lower case. |
| KANMX4_for                                         | TGTTGATGCGCTGGCAGTG                                                     |                                                                                                            |
| KANMX4_rev                                         | CCATACAATCGATAGATTGT                                                    |                                                                                                            |
| NATMX_for                                          | GAGGCCATCGAGGCACTG                                                      |                                                                                                            |
| NATMX_rev                                          | TCGTACAGGGCGGTGTCC                                                      |                                                                                                            |
| zrc1::KANMX4_for                                   | TCTAATATGATTTCTTGGCATAG                                                 |                                                                                                            |
| zrc1::KANMX4_rev                                   | CACACCGAAGTGAGCTTAATT                                                   |                                                                                                            |
| zrc1_verification_r                                | ACATTTGAAAGATCCATGAAAGT                                                 |                                                                                                            |
| ura3::NATMX_for                                    | tattaaccaactgcacagaacaaaaactgcaggaacgaagataaatcCAGTATAGCGACCAGCAT       | The sites for the NATMX marker are shown in upper case and homologous recombination regions in lower case. |
| ura3::NATMX_rev                                    | gctctaattgtgagtttagtatacatcattactataatacagtttGACATGGAGGCCAGAATAC        | The sites for the NATMX marker are shown in upper case and homologous recombination regions in lower case. |
| Primer sequences for sequencing (AFT1, COT1, ZRC1) |                                                                         |                                                                                                            |
| AFT1_seq_for                                       | AATAACACTAGTGAGGGAAGTA                                                  |                                                                                                            |
| AFT1_seq_rev                                       | CCTGATCTTAGACCAGATATAT                                                  |                                                                                                            |
| COT1_seq_for                                       | TATAGCAATTGCTGCGGAC                                                     |                                                                                                            |
| COT1_seq_rev                                       | TGCAAGACTATTGCTATTATATTA                                                |                                                                                                            |
| ZRC1_seq_for                                       | AAGGAAATGATATGAAAGTAGTTG                                                |                                                                                                            |
| ZRC1_seq_rev                                       | AGATGAGGAAGGATTGTGGC                                                    |                                                                                                            |
| MSN5_seq1_for                                      | AGAGCAAGATTCATTGAACAG                                                   |                                                                                                            |
| MSN5_seq1_rev                                      | GTTCTTTTGGCACCTCTACC                                                    |                                                                                                            |
| MSN5_seq2_for                                      | AGGATTACTAGACCATGCAGTG                                                  |                                                                                                            |
| MSN5_seq2_rev                                      | TACTATAGGGACGGGTCAACA                                                   |                                                                                                            |
| MSN5_seq3_for                                      | ACTGGCCATTAACAGAGGTCA                                                   |                                                                                                            |
| MSN5_seq3_rev                                      | GTGGAACCTAAGACCTGCTGAC                                                  |                                                                                                            |
| MSN5_seq4_for                                      | TAGGTTGATTTCTTGCCTCGA                                                   |                                                                                                            |
| MSN5_seq4_rev                                      | GCAAATCAGAAAGACCAACAAC                                                  |                                                                                                            |
| MSN5_seq5_for                                      | TACCCAGACCTTGAAAGTGTC                                                   |                                                                                                            |
| MSN5_seq5_rev                                      | CCTAATGATGTGTCTACGGAG                                                   |                                                                                                            |
| MSN5_seq6_for                                      | ACATATGAAAGCGATGCAAACC                                                  |                                                                                                            |
| MSN5_seq6_rev                                      | TCATCCACCGTTGTTTTG                                                      |                                                                                                            |
| MSN5_seq7_for                                      | TGAAATGCTGCTTAACCTCAGT                                                  |                                                                                                            |
| MSN5_seq7_rev                                      | AGAAATACCTTGTTCAGACCCA                                                  |                                                                                                            |
| PSE1_seq1_for                                      | AGCCACTTTATCCTAAC                                                       |                                                                                                            |
| PSE1_seq1_rev                                      | ACCTAACTGGACCACTC                                                       |                                                                                                            |
| PSE1_seq2_for                                      | ACTGATGCAAGTGATAATGTCA                                                  |                                                                                                            |
| PSE1_seq2_rev                                      | TCATCCAAGAGTACAGTATG                                                    |                                                                                                            |
| PSE1_seq3_for                                      | CGTCAAGCTCTTGATCGTGT                                                    |                                                                                                            |
| PSE1_seq3_rev                                      | GAAATCAGCTTTGAGAGT                                                      |                                                                                                            |
| PSE1_seq4_for                                      | TATGGAATGTGCAACTCTG                                                     |                                                                                                            |
| PSE1_seq4_rev                                      | GCAATTGTCACCATGA                                                        |                                                                                                            |
| PSE1_seq5_for                                      | CGGAGGCTTAATGTGAGAA                                                     |                                                                                                            |
| PSE1_seq5_rev                                      | CTACGTTAGGAATGTTGGA                                                     |                                                                                                            |
| PSE1_seq6_for                                      | TCTTCAACAGAGAATGCC                                                      |                                                                                                            |
| PSE1_seq6_rev                                      | GATACCATACCTTATCGAGT                                                    |                                                                                                            |
| Primer sequences for quantitative RT-PCR           |                                                                         |                                                                                                            |
| ACT1_QPCR_for                                      | ATTATATGTTTAGAGGTTGCTGCTTTGG                                            |                                                                                                            |
| ACT1_QPCR_rev                                      | AATTCGTTGTAGAAGGTATGATGCC                                               |                                                                                                            |
| AFT1_QPCR_for                                      | ATGCATCTAAAAGGCCATGC                                                    |                                                                                                            |
| AFT1_QPCR_rev                                      | GGCAGTGGAAGATTTTCATT                                                    |                                                                                                            |
| COT1_QPCR_for                                      | GCATGGTGTGTTCTTCACG                                                     |                                                                                                            |
| COT1_QPCR_rev                                      | GGAAGCCTTGACAGATAGAG                                                    |                                                                                                            |

**Table S2a:** Complete list of upregulated genes in CI25E

|    | Systematic name         | Gene name                  | logFC    | fold change | p.value    |
|----|-------------------------|----------------------------|----------|-------------|------------|
| 1  | <a href="#">YLR134w</a> | <a href="#">PDC5</a>       | 5,517619 | 45,8109009  | 2,99E-12   |
| 2  | <a href="#">YMR058w</a> | <a href="#">FET3</a>       | 3,680726 | 18,3318197  | 3,54E-09   |
| 3  | <a href="#">YLR136c</a> | <a href="#">TIS11/CTH2</a> | 4,196278 | 18,3318197  | 3,54E-09   |
| 4  | <a href="#">YHL040c</a> | <a href="#">ARN1</a>       | 3,336741 | 12,8235678  | 3,54E-09   |
| 5  | <a href="#">YOR383c</a> | <a href="#">FIT3</a>       | 2,952205 | 10,1032027  | 1,79E-08   |
| 6  | <a href="#">YNL237w</a> | <a href="#">YTP1</a>       | 2,873258 | 7,73930842  | 3,54E-09   |
| 7  | <a href="#">YEL065w</a> | <a href="#">SIT1</a>       | 2,821915 | 7,32717967  | 2,80E-08   |
| 8  | <a href="#">YLR214w</a> | <a href="#">FRE1</a>       | 2,609919 | 7,07100145  | 1,94E-08   |
| 9  | <a href="#">YDR270w</a> | <a href="#">CCC2</a>       | 2,483814 | 6,10469403  | 7,40E-09   |
| 10 | <a href="#">YOL158c</a> | <a href="#">ENB1</a>       | 2,419026 | 5,59374205  | 3,54E-09   |
| 11 | <a href="#">YKL163w</a> | <a href="#">PIR3</a>       | 2,22548  | 5,34809808  | 2,00E-08   |
| 12 | <a href="#">YER145c</a> | <a href="#">FTR1</a>       | 2,167321 | 4,67666385  | 9,14E-09   |
| 13 | <a href="#">YNL160w</a> | <a href="#">YGP1</a>       | 2,14057  | 4,49188533  | 1,79E-08   |
| 14 | <a href="#">YKL220c</a> | <a href="#">FRE2</a>       | 2,131905 | 4,40936275  | 1,62E-07   |
| 15 | <a href="#">YJL079c</a> | <a href="#">PRY1</a>       | 2,106897 | 4,38295728  | 9,14E-09   |
| 16 | <a href="#">YHL035c</a> | <a href="#">VMR1</a>       | 2,066273 | 4,30763871  | 9,14E-09   |
| 17 | <a href="#">YPR124w</a> | <a href="#">CTR1</a>       | 1,838017 | 4,18803311  | 2,80E-07   |
| 18 | <a href="#">YCL025c</a> | <a href="#">AGP1</a>       | 1,754655 | 3,57518287  | 8,38E-08   |
| 19 | <a href="#">YDR059c</a> | <a href="#">UBC5</a>       | 1,632038 | 3,37445575  | 1,50E-06   |
| 20 | <a href="#">YLR121c</a> | <a href="#">YPS3</a>       | 1,628915 | 3,09950633  | 4,16E-06   |
| 21 | <a href="#">YGR259c</a> | <a href="#">YGR259c</a>    | 1,551257 | 3,09280334  | 6,32E-06   |
| 22 | <a href="#">YOR382w</a> | <a href="#">FIT2</a>       | 1,53846  | 2,93072303  | 2,01E-05   |
| 23 | <a href="#">YLL051c</a> | <a href="#">FRE6</a>       | 1,508217 | 2,9048426   | 1,64E-05   |
| 24 | <a href="#">YLR205c</a> | <a href="#">HMX1</a>       | 1,488217 | 2,84458175  | 4,09E-07   |
| 25 | <a href="#">YDR046c</a> | <a href="#">BAP3</a>       | 1,487493 | 2,80541952  | 5,26E-06   |
| 26 | <a href="#">YGR110w</a> | <a href="#">CLD1</a>       | 1,394593 | 2,80401315  | 1,21E-06   |
| 27 | <a href="#">YIL169c</a> | <a href="#">YIL169c</a>    | 1,393307 | 2,62914386  | 2,88E-05   |
| 28 | <a href="#">YPL274w</a> | <a href="#">SAM3</a>       | 1,386136 | 2,62680066  | 1,87E-06   |
| 29 | <a href="#">YOL155c</a> | <a href="#">HPF1</a>       | 1,369926 | 2,6137773   | 8,75E-06   |
| 30 | <a href="#">YLR194c</a> | <a href="#">YLR194c</a>    | 1,344165 | 2,58457329  | 6,57E-05   |
| 31 | <a href="#">YOR381w</a> | <a href="#">FRE3</a>       | 1,333883 | 2,53883167  | 1,75E-06   |
| 32 | <a href="#">YFL057c</a> | <a href="#">AAD16</a>      | 1,313539 | 2,52080272  | 1,21E-06   |
| 33 | <a href="#">YFL056c</a> | <a href="#">AAD6</a>       | 1,308496 | 2,48550443  | 1,93E-06   |
| 34 | <a href="#">YFL030w</a> | <a href="#">AGX1</a>       | 1,265065 | 2,47683178  | 2,31E-06   |
| 35 | <a href="#">YOR072w</a> | <a href="#">YOR072w</a>    | 1,257712 | 2,40337972  | 2,04E-05   |
| 36 | <a href="#">YFL041w</a> | <a href="#">FET5</a>       | 1,22135  | 2,39116175  | 4,42E-06   |
| 37 | <a href="#">YGR189c</a> | <a href="#">CRH1</a>       | 1,218322 | 2,33164856  | 8,26E-05   |
| 38 | <a href="#">YPL052w</a> | <a href="#">OAZ1</a>       | 1,216537 | 2,32675855  | 0,00017752 |
| 39 | <a href="#">YJL153c</a> | <a href="#">INO1</a>       | 1,189061 | 2,32388186  | 5,93E-06   |
| 40 | <a href="#">YBR295w</a> | <a href="#">PCA1</a>       | 1,185105 | 2,28004311  | 7,87E-05   |
| 41 | <a href="#">YHR138c</a> | <a href="#">YHR138c</a>    | 1,182035 | 2,27379912  | 3,35E-06   |
| 42 | <a href="#">YMR056c</a> | <a href="#">AAC1</a>       | 1,180134 | 2,26896679  | 1,50E-05   |
| 43 | <a href="#">YGR043c</a> | <a href="#">NQM1</a>       | 1,157919 | 2,26597897  | 8,90E-06   |

|    |                           |                           |          |            |            |
|----|---------------------------|---------------------------|----------|------------|------------|
| 44 | <a href="#">YLR327c</a>   | <a href="#">TMA10</a>     | 1,11867  | 2,23135339 | 0,0114313  |
| 45 | <a href="#">YGL121c</a>   | <a href="#">GPG1</a>      | 1,110364 | 2,17146739 | 0,00052541 |
| 46 | <a href="#">YAR068w</a>   | <a href="#">YAR068w</a>   | 1,098757 | 2,1590009  | 0,0003748  |
| 47 | <a href="#">YBL043w</a>   | <a href="#">ECM13</a>     | 1,095811 | 2,14170139 | 1,49E-05   |
| 48 | <a href="#">YBR071w</a>   | <a href="#">YBR071w</a>   | 1,088984 | 2,13733267 | 7,46E-06   |
| 49 | <a href="#">YHR048w</a>   | <a href="#">YHK8</a>      | 1,084842 | 2,1272422  | 0,00021259 |
| 50 | <a href="#">YBL048w</a>   | <a href="#">YBL048w</a>   | 1,067366 | 2,12114316 | 0,00014907 |
| 51 | <a href="#">YDL169c</a>   | <a href="#">UGX2</a>      | 1,04943  | 2,09560393 | 4,58E-05   |
| 52 | <a href="#">YLL058w</a>   | <a href="#">YLL058w</a>   | 1,037509 | 2,06971209 | 2,96E-05   |
| 53 | <a href="#">YHR214w-a</a> | <a href="#">YHR214w-a</a> | 1,033619 | 2,05268013 | 0,0008639  |
| 54 | <a href="#">YNL202w</a>   | <a href="#">SPS19</a>     | 1,029691 | 2,04715331 | 4,34E-05   |
| 55 | <a href="#">YLR030w</a>   | <a href="#">YLR030w</a>   | 1,021225 | 2,04158736 | 5,51E-05   |
| 56 | <a href="#">YER175c</a>   | <a href="#">TMT1</a>      | 1,02104  | 2,02964091 | 7,60E-05   |
| 57 | <a href="#">YIL101c</a>   | <a href="#">XBP1</a>      | 1,006256 | 2,01229912 | 0,00206695 |
| 58 | <a href="#">YKR013w</a>   | <a href="#">PRY2</a>      | 0,994925 | 2,00869121 | 7,73E-05   |
| 59 | <a href="#">YLL057c</a>   | <a href="#">JLP1</a>      | 0,993123 | 1,99297712 | 0,0004855  |
| 60 | <a href="#">YLR047c</a>   | <a href="#">FRE8</a>      | 0,982251 | 1,9904891  | 0,00024304 |
| 61 | <a href="#">YGL071W</a>   | <a href="#">AFT1</a>      | 0,977694 | 1,97554566 | 7,49E-05   |
| 62 | <a href="#">YLR034c</a>   | <a href="#">SMF3</a>      | 0,976111 | 1,96931556 | 2,81E-05   |
| 63 | <a href="#">YGR065c</a>   | <a href="#">VHT1</a>      | 0,97513  | 1,9671552  | 0,00034427 |
| 64 | <a href="#">YGR279c</a>   | <a href="#">SCW4</a>      | 0,959286 | 1,9658178  | 6,07E-05   |
| 65 | <a href="#">YDR264c</a>   | <a href="#">AKR1</a>      | 0,956932 | 1,94434674 | 5,02E-05   |
| 66 | <a href="#">YMR002w</a>   | <a href="#">MIC17</a>     | 0,944878 | 1,94117705 | 2,47E-05   |
| 67 | <a href="#">YGR055w</a>   | <a href="#">MIUP1</a>     | 0,942225 | 1,92502571 | 0,00095054 |
| 68 | <a href="#">YLL056c</a>   | <a href="#">YLL056c</a>   | 0,93279  | 1,92148991 | 0,00030735 |
| 69 | <a href="#">YOL153c</a>   | <a href="#">YOL153c</a>   | 0,931328 | 1,90896466 | 9,35E-05   |
| 70 | <a href="#">YNL289w</a>   | <a href="#">PCL1</a>      | 0,930473 | 1,90702995 | 0,00034897 |
| 71 | <a href="#">YMR034c</a>   | <a href="#">YMR034c</a>   | 0,930324 | 1,9059012  | 0,00016953 |
| 72 | <a href="#">YPR151c</a>   | <a href="#">SUE1</a>      | 0,919206 | 1,90570439 | 0,00010033 |
| 73 | <a href="#">YPL156c</a>   | <a href="#">PRM4</a>      | 0,909514 | 1,89107472 | 0,00020306 |
| 74 | <a href="#">YBR207w</a>   | <a href="#">FTH1</a>      | 0,909094 | 1,87841306 | 0,00034324 |
| 75 | <a href="#">YGL104c</a>   | <a href="#">VPS73</a>     | 0,901518 | 1,87786529 | 6,86E-05   |
| 76 | <a href="#">YDR055w</a>   | <a href="#">PST1</a>      | 0,897921 | 1,86802994 | 4,08E-05   |
| 77 | <a href="#">YBR046c</a>   | <a href="#">ZTA1</a>      | 0,897885 | 1,86337886 | 9,52E-05   |
| 78 | <a href="#">YOR385w</a>   | <a href="#">YOR385w</a>   | 0,894488 | 1,86333242 | 6,58E-05   |
| 79 | <a href="#">YGR079w</a>   | <a href="#">YGR079w</a>   | 0,889465 | 1,85894955 | 0,00157442 |
| 80 | <a href="#">YPL111w</a>   | <a href="#">CAR1</a>      | 0,883549 | 1,85248929 | 0,00033493 |
| 81 | <a href="#">YOR338w</a>   | <a href="#">YOR338w</a>   | 0,869806 | 1,84490766 | 0,0005375  |
| 82 | <a href="#">YCL026C-B</a> | <a href="#">HBN1</a>      | 0,856596 | 1,82741726 | 9,74E-05   |
| 83 | <a href="#">YLR414c</a>   | <a href="#">PUN1</a>      | 0,856404 | 1,81076134 | 9,74E-05   |
| 84 | <a href="#">YJL185c</a>   | <a href="#">YJL185c</a>   | 0,855881 | 1,81051944 | 0,00039283 |
| 85 | <a href="#">YDL021w</a>   | <a href="#">GPM2</a>      | 0,850822 | 1,80986363 | 0,0002146  |
| 86 | <a href="#">YIL042c</a>   | <a href="#">PKP1</a>      | 0,845466 | 1,80352837 | 6,21E-05   |
| 87 | <a href="#">YPR001w</a>   | <a href="#">CIT3</a>      | 0,845388 | 1,79684549 | 0,00076605 |
| 88 | <a href="#">YER064c</a>   | <a href="#">YER064c</a>   | 0,842639 | 1,79674822 | 0,00101164 |
| 89 | <a href="#">YAL062w</a>   | <a href="#">GDH3</a>      | 0,840768 | 1,79332717 | 0,00033331 |

|     |                           |                           |          |            |            |
|-----|---------------------------|---------------------------|----------|------------|------------|
| 90  | <a href="#">YBL049w</a>   | <a href="#">MOH1</a>      | 0,838385 | 1,79100382 | 0,00087947 |
| 91  | <a href="#">YHL026c</a>   | <a href="#">YHL026c</a>   | 0,836229 | 1,78804726 | 0,00018902 |
| 92  | <a href="#">YML043c</a>   | <a href="#">RRN11</a>     | 0,825606 | 1,78537688 | 0,00584027 |
| 93  | <a href="#">YLR031w</a>   | <a href="#">YLR031w</a>   | 0,825301 | 1,77227964 | 0,0003748  |
| 94  | <a href="#">YPL277c</a>   | <a href="#">YPL277c</a>   | 0,819092 | 1,7719045  | 0,00022459 |
| 95  | <a href="#">YER039c</a>   | <a href="#">HVG1</a>      | 0,816655 | 1,76429529 | 0,00015798 |
| 96  | <a href="#">YKR091w</a>   | <a href="#">SRL3</a>      | 0,816379 | 1,76131703 | 0,00034883 |
| 97  | <a href="#">YLR234w</a>   | <a href="#">TOP3</a>      | 0,813532 | 1,76098046 | 0,00082547 |
| 98  | <a href="#">YGL156w</a>   | <a href="#">AMS1</a>      | 0,808088 | 1,75750845 | 0,00088975 |
| 99  | <a href="#">YEL038w</a>   | <a href="#">UTR4</a>      | 0,807983 | 1,75088926 | 0,00012726 |
| 100 | <a href="#">YJL159w</a>   | <a href="#">HSP150</a>    | 0,800409 | 1,75076176 | 0,000555   |
| 101 | <a href="#">YPL163c</a>   | <a href="#">SVS1</a>      | 0,795167 | 1,74159493 | 0,00017086 |
| 102 | <a href="#">YMR191w</a>   | <a href="#">SPG5</a>      | 0,793444 | 1,73527814 | 0,00019758 |
| 103 | <a href="#">YKR049c</a>   | <a href="#">FMP46</a>     | 0,790029 | 1,73320697 | 0,00149499 |
| 104 | <a href="#">YLR324w</a>   | <a href="#">PEX30</a>     | 0,785604 | 1,72910967 | 0,00066002 |
| 105 | <a href="#">YGR213c</a>   | <a href="#">RTA1</a>      | 0,783741 | 1,72381409 | 0,00204616 |
| 106 | <a href="#">YBR294w</a>   | <a href="#">SUL1</a>      | 0,775379 | 1,72158926 | 0,00326117 |
| 107 | <a href="#">YOR185c</a>   | <a href="#">GSP2</a>      | 0,773771 | 1,71164017 | 0,00019498 |
| 108 | <a href="#">YLR213c</a>   | <a href="#">CRR1</a>      | 0,769931 | 1,70973237 | 0,00350762 |
| 109 | <a href="#">YEL060c</a>   | <a href="#">PRB1</a>      | 0,763791 | 1,7051886  | 0,00096814 |
| 110 | <a href="#">YFL055w</a>   | <a href="#">AGP3</a>      | 0,762462 | 1,69794706 | 0,00129814 |
| 111 | <a href="#">YPR030w</a>   | <a href="#">CSR2</a>      | 0,760644 | 1,69638308 | 0,00264597 |
| 112 | <a href="#">YIR038c</a>   | <a href="#">GTT1</a>      | 0,753336 | 1,69424681 | 0,0001652  |
| 113 | <a href="#">YDR379c-a</a> | <a href="#">YDR379c-a</a> | 0,753223 | 1,68568563 | 0,00048135 |
| 114 | <a href="#">YAL053w</a>   | <a href="#">FLC2</a>      | 0,746565 | 1,68555394 | 0,00048135 |
| 115 | <a href="#">YER004w</a>   | <a href="#">FMP52</a>     | 0,745098 | 1,67779308 | 0,00016607 |
| 116 | <a href="#">YKR041w</a>   | <a href="#">YKR041w</a>   | 0,736618 | 1,6760877  | 0,01906715 |
| 117 | <a href="#">YOR208w</a>   | <a href="#">PTP2</a>      | 0,734098 | 1,66626573 | 0,00086449 |
| 118 | <a href="#">YLR046c</a>   | <a href="#">YLR046c</a>   | 0,730795 | 1,66335765 | 0,00053574 |
| 119 | <a href="#">YEL020c</a>   | <a href="#">YEL020c</a>   | 0,730781 | 1,65955307 | 0,00093523 |
| 120 | <a href="#">YPL278c</a>   | <a href="#">YPL278c</a>   | 0,728435 | 1,65953691 | 0,00044212 |
| 121 | <a href="#">YHL024w</a>   | <a href="#">RIM4</a>      | 0,723426 | 1,65684046 | 0,00669229 |
| 122 | <a href="#">YLL039c</a>   | <a href="#">UBI4</a>      | 0,723327 | 1,65109781 | 0,00049159 |
| 123 | <a href="#">YBR026C</a>   | <a href="#">MRF1'</a>     | 0,721219 | 1,65098538 | 0,00048135 |
| 124 | <a href="#">YNL065w</a>   | <a href="#">AQR1</a>      | 0,718366 | 1,64857455 | 0,00354952 |
| 125 | <a href="#">YHR137w</a>   | <a href="#">ARO9</a>      | 0,714694 | 1,64531804 | 0,00255186 |
| 126 | <a href="#">YMR145c</a>   | <a href="#">NDE1</a>      | 0,71039  | 1,64113465 | 0,0018515  |
| 127 | <a href="#">YNL305c</a>   | <a href="#">YNL305c</a>   | 0,708684 | 1,63624592 | 0,0009724  |
| 128 | <a href="#">YKR061w</a>   | <a href="#">KTR2</a>      | 0,704456 | 1,63431311 | 0,0044098  |
| 129 | <a href="#">YBR182c</a>   | <a href="#">SMP1</a>      | 0,703542 | 1,62953022 | 0,00085073 |
| 130 | <a href="#">YLR237w</a>   | <a href="#">THI7</a>      | 0,698405 | 1,62849803 | 0,00074664 |
| 131 | <a href="#">YLL060c</a>   | <a href="#">GTT2</a>      | 0,698059 | 1,62271021 | 0,00051073 |
| 132 | <a href="#">YLR063w</a>   | <a href="#">YLR063w</a>   | 0,697902 | 1,62232107 | 0,00953146 |
| 133 | <a href="#">YMR148w</a>   | <a href="#">OSW5</a>      | 0,69586  | 1,62214365 | 0,00075443 |
| 134 | <a href="#">YJL151c</a>   | <a href="#">SNA3</a>      | 0,694427 | 1,61985015 | 0,00039995 |
| 135 | <a href="#">YPL104w</a>   | <a href="#">MSD1</a>      | 0,691723 | 1,61824197 | 0,00076605 |

|     |                           |                           |          |            |            |
|-----|---------------------------|---------------------------|----------|------------|------------|
| 136 | <a href="#">YJL149w</a>   | <a href="#">DAS1</a>      | 0,687597 | 1,61521166 | 0,00106758 |
| 137 | <a href="#">YJL116c</a>   | <a href="#">NCA3</a>      | 0,685625 | 1,61059895 | 0,00494412 |
| 138 | <a href="#">YPL149W</a>   | <a href="#">ATG5</a>      | 0,681063 | 1,60839874 | 0,00099962 |
| 139 | <a href="#">YHL010c</a>   | <a href="#">ETP1</a>      | 0,680876 | 1,60332114 | 0,00469771 |
| 140 | <a href="#">YHL016c</a>   | <a href="#">DUR3</a>      | 0,678851 | 1,60311311 | 0,00558467 |
| 141 | <a href="#">YER062c</a>   | <a href="#">HOR2</a>      | 0,678779 | 1,60086427 | 0,0014873  |
| 142 | <a href="#">YDL130w-a</a> | <a href="#">STF1</a>      | 0,678607 | 1,60078461 | 0,00230962 |
| 143 | <a href="#">YDR525w-a</a> | <a href="#">SNA2</a>      | 0,676428 | 1,60059368 | 0,00420778 |
| 144 | <a href="#">YER095w</a>   | <a href="#">RAD51</a>     | 0,672315 | 1,59817831 | 0,00051073 |
| 145 | <a href="#">YBR116c</a>   | <a href="#">YBR116c</a>   | 0,664785 | 1,59362774 | 0,00121921 |
| 146 | <a href="#">YGL209w</a>   | <a href="#">MIG2</a>      | 0,663714 | 1,58533201 | 0,00171177 |
| 147 | <a href="#">YDR476c</a>   | <a href="#">YDR476c</a>   | 0,662118 | 1,58415551 | 0,00066002 |
| 148 | <a href="#">YJL117w</a>   | <a href="#">PHO86</a>     | 0,656304 | 1,58240353 | 0,00048135 |
| 149 | <a href="#">YJR019c</a>   | <a href="#">TES1</a>      | 0,652618 | 1,57604006 | 0,00090547 |
| 150 | <a href="#">YPL107w</a>   | <a href="#">YPL107w</a>   | 0,652607 | 1,57201843 | 0,00197372 |
| 151 | <a href="#">YOL119c</a>   | <a href="#">MCH4</a>      | 0,649544 | 1,57200647 | 0,00057046 |
| 152 | <a href="#">YML038c</a>   | <a href="#">YMD8</a>      | 0,648869 | 1,56867217 | 0,00124059 |
| 153 | <a href="#">YHR209w</a>   | <a href="#">CRG1</a>      | 0,646456 | 1,56793841 | 0,00212902 |
| 154 | <a href="#">YBR005w</a>   | <a href="#">RCR1</a>      | 0,645861 | 1,5653186  | 0,00092586 |
| 155 | <a href="#">YNL282w</a>   | <a href="#">POP3</a>      | 0,645806 | 1,56467287 | 0,0130576  |
| 156 | <a href="#">YKR046c</a>   | <a href="#">PET10</a>     | 0,643772 | 1,56461304 | 0,00051292 |
| 157 | <a href="#">YMR035w</a>   | <a href="#">IMP2</a>      | 0,642661 | 1,56240836 | 0,00479393 |
| 158 | <a href="#">YOL083w</a>   | <a href="#">YOL083w</a>   | 0,642002 | 1,5612065  | 0,00658531 |
| 159 | <a href="#">YOR389w</a>   | <a href="#">YOR389w</a>   | 0,638607 | 1,56049346 | 0,00138527 |
| 160 | <a href="#">YOR289w</a>   | <a href="#">YOR289w</a>   | 0,637931 | 1,55682574 | 0,00289643 |
| 161 | <a href="#">YGL096w</a>   | <a href="#">TOS8</a>      | 0,637538 | 1,5560962  | 0,01664795 |
| 162 | <a href="#">YMR305c</a>   | <a href="#">SCW10</a>     | 0,63688  | 1,55567208 | 0,00384144 |
| 163 | <a href="#">YNL083w</a>   | <a href="#">SAL1</a>      | 0,635073 | 1,55496264 | 0,00157442 |
| 164 | <a href="#">YNL208w</a>   | <a href="#">YNL208w</a>   | 0,633328 | 1,55301673 | 0,00575423 |
| 165 | <a href="#">YPR193c</a>   | <a href="#">HPA2</a>      | 0,632702 | 1,55113883 | 0,00978502 |
| 166 | <a href="#">YLR142w</a>   | <a href="#">PUT1</a>      | 0,630827 | 1,55046596 | 0,00980252 |
| 167 | <a href="#">YMR280c</a>   | <a href="#">CAT8</a>      | 0,629989 | 1,54845187 | 0,00263016 |
| 168 | <a href="#">YNL300w</a>   | <a href="#">TOS6</a>      | 0,628935 | 1,54755353 | 0,00111371 |
| 169 | <a href="#">YMR238w</a>   | <a href="#">DFG5</a>      | 0,624456 | 1,54642271 | 0,0026006  |
| 170 | <a href="#">YJL082w</a>   | <a href="#">IML2</a>      | 0,623476 | 1,54162978 | 0,00085073 |
| 171 | <a href="#">YER142c</a>   | <a href="#">MAG1</a>      | 0,622209 | 1,54058223 | 0,00194469 |
| 172 | <a href="#">YBR269c</a>   | <a href="#">FMP21</a>     | 0,622123 | 1,5392301  | 0,00098313 |
| 173 | <a href="#">YMR304c-a</a> | <a href="#">YMR304c-a</a> | 0,619956 | 1,53913798 | 0,00274065 |
| 174 | <a href="#">YLR126c</a>   | <a href="#">YLR126c</a>   | 0,619835 | 1,53682787 | 0,00129637 |
| 175 | <a href="#">YPR157w</a>   | <a href="#">YPR157w</a>   | 0,616292 | 1,53669949 | 0,04503465 |
| 176 | <a href="#">YGR153w</a>   | <a href="#">YGR153w</a>   | 0,614781 | 1,53293068 | 0,00255186 |
| 177 | <a href="#">YGR149w</a>   | <a href="#">YGR149w</a>   | 0,614484 | 1,53132576 | 0,00089199 |
| 178 | <a href="#">YOL122c</a>   | <a href="#">SMF1</a>      | 0,613192 | 1,53100999 | 0,00194993 |
| 179 | <a href="#">YGL146c</a>   | <a href="#">RRT6</a>      | 0,612997 | 1,52963993 | 0,00358661 |
| 180 | <a href="#">YLR174w</a>   | <a href="#">IDP2</a>      | 0,61207  | 1,52943331 | 0,00899779 |
| 181 | <a href="#">YOL048c</a>   | <a href="#">RRT8</a>      | 0,610067 | 1,52845036 | 0,00504818 |

|     |                         |                         |          |            |            |
|-----|-------------------------|-------------------------|----------|------------|------------|
| 182 | <a href="#">YCR060w</a> | <a href="#">TAH1</a>    | 0,605413 | 1,52633024 | 0,0028882  |
| 183 | <a href="#">YOR359w</a> | <a href="#">VTS1</a>    | 0,605112 | 1,52141392 | 0,02181374 |
| 184 | <a href="#">YLR120c</a> | <a href="#">YPS1</a>    | 0,604464 | 1,5210968  | 0,00149046 |
| 185 | <a href="#">YDR077w</a> | <a href="#">SED1</a>    | 0,603914 | 1,52041393 | 0,00211517 |
| 186 | <a href="#">YDR492w</a> | <a href="#">IZH1</a>    | 0,602805 | 1,51983415 | 0,00240174 |
| 187 | <a href="#">YDL070w</a> | <a href="#">BDF2</a>    | 0,602511 | 1,51866609 | 0,01175348 |
| 188 | <a href="#">YLL059c</a> | <a href="#">YLL059c</a> | 0,602403 | 1,5183571  | 0,00819349 |
| 189 | <a href="#">YDL144c</a> | <a href="#">YDL144c</a> | 0,597185 | 1,51824355 | 0,00099962 |
| 190 | <a href="#">YPL134c</a> | <a href="#">ODC1</a>    | 0,595056 | 1,5127616  | 0,00255186 |
| 191 | <a href="#">YGL029w</a> | <a href="#">CGR1</a>    | 0,594227 | 1,51053161 | 0,0242477  |
| 192 | <a href="#">YEL059w</a> | <a href="#">YEL059w</a> | 0,592057 | 1,50966385 | 0,00933016 |
| 193 | <a href="#">YIR018w</a> | <a href="#">YAP5</a>    | 0,591646 | 1,50739408 | 0,00202916 |
| 194 | <a href="#">YHR057c</a> | <a href="#">CPR2</a>    | 0,590634 | 1,50696554 | 0,00110842 |
| 195 | <a href="#">YDR265w</a> | <a href="#">PEX10</a>   | 0,589364 | 1,50590879 | 0,00205087 |
| 196 | <a href="#">YKL175w</a> | <a href="#">ZRT3</a>    | 0,588737 | 1,50458301 | 0,00494412 |
| 197 | <a href="#">YIL150C</a> | <a href="#">MCM10</a>   | 0,587823 | 1,50392963 | 0,01012526 |
| 198 | <a href="#">YBR267w</a> | <a href="#">REI1</a>    | 0,587524 | 1,5029769  | 0,01649833 |
| 199 | <a href="#">YGL047w</a> | <a href="#">ALG13</a>   | 0,58646  | 1,50266565 | 0,00118708 |
| 200 | <a href="#">YKR076w</a> | <a href="#">ECM4</a>    | 0,584285 | 1,50155773 | 0,00163667 |



**Table S2b:** List of downregulated genes in the cobalt resistant CI25E strain

|    | Systematic                | gene                      | logFC        | fold change | p.value    |
|----|---------------------------|---------------------------|--------------|-------------|------------|
| 1  | <a href="#">YGR088w</a>   | <a href="#">CTT1</a>      | -1,948547728 | 0,227130717 | 0,00012751 |
| 2  | <a href="#">YIL014c-a</a> | <a href="#">YIL014c-a</a> | 2,13E-05     | 0,259076896 | 0,99987926 |
| 3  | <a href="#">YIL006w</a>   | <a href="#">YIA6</a>      | 0,00030776   | 0,279384201 | 0,99896558 |
| 4  | <a href="#">YJR025c</a>   | <a href="#">BNA1</a>      | -1,839677658 | 0,319215411 | 3,56E-07   |
| 5  | <a href="#">YIL015w</a>   | <a href="#">BAR1</a>      | -1,647397791 | 0,326723074 | 2,53E-07   |
| 6  | <a href="#">YIR030c</a>   | <a href="#">DCG1</a>      | -1,61385975  | 0,334831044 | 2,97E-07   |
| 7  | <a href="#">YER103w</a>   | <a href="#">SSA4</a>      | -1,578494799 | 0,347274829 | 0,01031094 |
| 8  | <a href="#">YCL021w-a</a> | <a href="#">YCL021w-a</a> | -1,525850251 | 0,347702164 | 1,39E-05   |
| 9  | <a href="#">YAL068c</a>   | <a href="#">PAU8</a>      | -1,524076049 | 0,353884265 | 4,09E-07   |
| 10 | <a href="#">YGL261c</a>   | <a href="#">PAU11</a>     | -1,498650478 | 0,358422466 | 1,21E-06   |
| 11 | <a href="#">YBL107w-a</a> | <a href="#">YBL107w-a</a> | -1,480267027 | 0,364688389 | 1,51E-06   |
| 12 | <a href="#">YMR105c</a>   | <a href="#">PGM2</a>      | -1,455263827 | 0,37730689  | 0,00226877 |
| 13 | <a href="#">YGR052w</a>   | <a href="#">FMP48</a>     | -1,406189651 | 0,38201444  | 0,00019498 |
| 14 | <a href="#">YLR231c</a>   | <a href="#">BNA5</a>      | -1,388300921 | 0,385671375 | 1,18E-06   |
| 15 | <a href="#">YDR542w</a>   | <a href="#">PAU10</a>     | -1,374556023 | 0,386319641 | 1,50E-06   |
| 16 | <a href="#">YGR142w</a>   | <a href="#">BTN2</a>      | -1,372133068 | 0,38686054  | 0,00662688 |
| 17 | <a href="#">YGR294w</a>   | <a href="#">PAU12</a>     | -1,370114515 | 0,390120875 | 1,21E-06   |
| 18 | <a href="#">YBR072w</a>   | <a href="#">HSP26</a>     | -1,358006896 | 0,396022393 | 0,01278431 |
| 19 | <a href="#">YOR032c</a>   | <a href="#">HMS1</a>      | -1,336346085 | 0,399140274 | 2,01E-06   |
| 20 | <a href="#">YJL223c</a>   | <a href="#">PAU1</a>      | -1,325032238 | 0,402643269 | 2,74E-06   |
| 21 | <a href="#">YAL061w</a>   | <a href="#">BDH2</a>      | -1,312425878 | 0,404889893 | 0,00234874 |
| 22 | <a href="#">YNR075w</a>   | <a href="#">COS10</a>     | -1,304398464 | 0,413738937 | 7,46E-06   |
| 23 | <a href="#">YNR068c</a>   | <a href="#">YNR068c</a>   | -1,27320736  | 0,41949924  | 4,11E-05   |
| 24 | <a href="#">YFR015c</a>   | <a href="#">GSY1</a>      | -1,253259899 | 0,420033275 | 0,0004479  |
| 25 | <a href="#">YOR071c</a>   | <a href="#">NRT1</a>      | -1,251424472 | 0,423805405 | 7,68E-06   |
| 26 | <a href="#">YML054c</a>   | <a href="#">CYB2</a>      | -1,238526108 | 0,428461148 | 0,00075443 |
| 27 | <a href="#">YBL108c-a</a> | <a href="#">PAU9</a>      | -1,222763706 | 0,430424356 | 3,17E-06   |
| 28 | <a href="#">YOR161c</a>   | <a href="#">PNS1</a>      | -1,216168379 | 0,433564891 | 0,00442605 |
| 29 | <a href="#">YLR304c</a>   | <a href="#">ACO1</a>      | -1,205680158 | 0,436809084 | 1,11E-05   |
| 30 | <a href="#">YBR083w</a>   | <a href="#">TEC1</a>      | -1,194925235 | 0,441723974 | 5,93E-06   |
| 31 | <a href="#">YHL046c</a>   | <a href="#">PAU13</a>     | -1,17878296  | 0,443242998 | 5,20E-06   |
| 32 | <a href="#">YBR301W</a>   | <a href="#">DAN3</a>      | -1,173830253 | 0,443769517 | 9,65E-06   |
| 33 | <a href="#">YFL026w</a>   | <a href="#">STE2</a>      | -1,172117524 | 0,444894927 | 5,62E-06   |
| 34 | <a href="#">YDR516c</a>   | <a href="#">EMI2</a>      | -1,168463446 | 0,445780543 | 0,00034139 |
| 35 | <a href="#">YER138w-a</a> | <a href="#">YER138w-a</a> | -1,165594445 | 0,445934363 | 0,00011375 |
| 36 | <a href="#">YJR078w</a>   | <a href="#">BNA2</a>      | -1,16509672  | 0,448244289 | 0,00021323 |
| 37 | <a href="#">YIL176c</a>   | <a href="#">PAU14</a>     | -1,157642892 | 0,448795234 | 2,58E-05   |
| 38 | <a href="#">YGR248w</a>   | <a href="#">SOL4</a>      | -1,155870741 | 0,449681368 | 0,00919803 |
| 39 | <a href="#">YNR014w</a>   | <a href="#">YNR014w</a>   | -1,153024985 | 0,456656175 | 0,00640747 |
| 40 | <a href="#">YKL209c</a>   | <a href="#">STE6</a>      | -1,130819755 | 0,461266864 | 1,65E-05   |
| 41 | <a href="#">YPR160w</a>   | <a href="#">GPH1</a>      | -1,116326439 | 0,47218523  | 0,01236419 |
| 42 | <a href="#">YBL098w</a>   | <a href="#">BNA4</a>      | -1,082575181 | 0,480468853 | 2,96E-05   |
| 43 | <a href="#">YIL119c</a>   | <a href="#">RPI1</a>      | -1,057485184 | 0,482056819 | 4,58E-05   |
| 44 | <a href="#">YEL049w</a>   | <a href="#">PAU2</a>      | -1,052724892 | 0,483815984 | 2,06E-05   |

|    |                         |                        |              |             |            |
|----|-------------------------|------------------------|--------------|-------------|------------|
| 45 | <a href="#">YLR461w</a> | <a href="#">PAU4</a>   | -1,047469663 | 0,493725774 | 4,99E-05   |
| 46 | <a href="#">YDR342c</a> | <a href="#">HXT7</a>   | -1,018218136 | 0,496292713 | 0,01261195 |
| 47 | <a href="#">YJL088w</a> | <a href="#">ARG3</a>   | -1,010736822 | 0,496743197 | 0,0001652  |
| 48 | <a href="#">YNR076w</a> | <a href="#">PAU6</a>   | -1,009427885 | 0,499299933 | 1,11E-05   |
| 49 | <a href="#">YLL064c</a> | <a href="#">PAU18</a>  | -1,002021383 | 0,505146286 | 3,63E-05   |
| 50 | <a href="#">YHR055c</a> | <a href="#">CUP1-2</a> | -0,985226856 | 0,505581256 | 0,00048135 |
| 51 | <a href="#">YHR216w</a> | <a href="#">IMD2</a>   | -0,983985117 | 0,508447996 | 2,36E-05   |
| 52 | <a href="#">YHR053c</a> | <a href="#">CUP1-1</a> | -0,975827871 | 0,512185678 | 3,63E-05   |

**Table S3:** Main transcription factors that were identified from enriched functional categories listed in Table 2 & 3 from transcriptome profile of the cobalt resistant CI25E strain\*

| Main Functional category                                                                             | Transcription factor | Description of the biological function                                                                                                                                                                                                                                | % relative to total genes in the list regulated by this TF | % relative to the total number of genes regulated by this TF |
|------------------------------------------------------------------------------------------------------|----------------------|-----------------------------------------------------------------------------------------------------------------------------------------------------------------------------------------------------------------------------------------------------------------------|------------------------------------------------------------|--------------------------------------------------------------|
| Metal ions (Cu <sup>+</sup> , Fe <sup>2+</sup> , Fe <sup>3+</sup> , etc.) transport, and homeostasis | Aft1                 | Transcription factor involved in iron utilization and homeostasis; binds the consensus site PyPuCACCCPu and activates the expression of target genes in response to changes in iron availability                                                                      | 76                                                         | 1.8                                                          |
|                                                                                                      | Aft2                 | Iron-regulated transcriptional activator; activates genes involved in intracellular iron use and required for iron homeostasis and resistance to oxidative stress; similar to Aft1p                                                                                   | 64                                                         | 6.8                                                          |
|                                                                                                      | Put3                 | Transcriptional activator of proline utilization genes, constitutively binds PUT1 and PUT2 promoter sequences; has a Zn(2)-Cys(6) binuclear cluster domain                                                                                                            | 68                                                         | 10.3                                                         |
| Transmembrane transport (for C-compounds, carbohydrates, amino acids and amino acids derivatives)    | Ste2                 | Transcription factor that is activated by a MAP kinase signaling cascade, activates genes involved in mating or pseudohyphal/invasive growth pathways; cooperates with Tec1p transcription factor to regulate genes specific for invasive growth                      | 56                                                         | 0.4                                                          |
|                                                                                                      | Yap1                 | Basic leucine zipper (bZIP) transcription factor required for oxidative stress tolerance; activated by H <sub>2</sub> O <sub>2</sub> through the multistep formation of disulfide bonds and transit from the cytoplasm to the nucleus; mediates resistance to cadmium | 50                                                         | 0.5                                                          |
|                                                                                                      | Msn2                 | Transcriptional activator activated in stress conditions, which results in translocation from the cytoplasm to the nucleus; binds DNA at stress response elements of responsive genes                                                                                 | 50                                                         | 0.7                                                          |
| Cell wall proteins, cell wall organization                                                           | Ste12                | Transcription factor that is activated by a MAP kinase signaling cascade, activates genes involved in mating or pseudohyphal/invasive growth pathways; cooperates with Tec1p transcription factor to regulate genes specific for invasive growth                      | 94                                                         | 0.4                                                          |
|                                                                                                      | Yap1                 | Basic leucine zipper (bZIP) transcription factor required for oxidative stress tolerance; activated by H <sub>2</sub> O <sub>2</sub> through the multistep formation of disulfide bonds and transit from the cytoplasm to the nucleus; mediates resistance to cadmium | 71                                                         | 0.5                                                          |
| Metabolic processes, with emphasis on carbon and amino acid metabolism                               | Yap1                 | Basic leucine zipper (bZIP) transcription factor required for oxidative stress tolerance; activated by H <sub>2</sub> O <sub>2</sub> through the multistep formation of disulfide bonds and transit from the cytoplasm to the nucleus; mediates resistance to cadmium | 71.4                                                       | 0.5                                                          |
| PAU family and other stress genes                                                                    | Upc2                 | Sterol regulatory element binding protein, induces transcription of sterol transport and biosynthetic genes; involved in the anaerobic induction of DAN/TIR mannoproteins and seripauperins; binucleate zinc cluster protein                                          | 82                                                         | 7.1                                                          |
|                                                                                                      | Aft1                 | Transcription factor involved in iron utilization and homeostasis; binds the consensus site PyPuCACCCPu and activates the expression of target genes in response to changes in iron availability                                                                      | 76                                                         | 1.8                                                          |
| Biosynthesis of vitamins, cofactors (NAD <sup>+</sup> ) and prosthetic group                         | Sum1                 | Transcriptional repressor required for mitotic repression of middle sporulation-specific genes; involved in telomere maintenance, regulated by the pachytene checkpoint                                                                                               | 83                                                         | 3.1                                                          |
|                                                                                                      | Leu3                 | Zinc-finger transcription factor that regulates genes involved in branched chain amino acid biosynthesis and ammonia assimilation; positively regulated by alpha-isopropylmalate, an intermediate in leucine biosynthesis                                             | 83                                                         | 1                                                            |

\*Yeasttract ([www.yeasttract.com](http://www.yeasttract.com)) has been used to search for TF associated to the functional categories

**Table S4:** List of the *AFT1*-dependent genes activation in the cobalt evolved strain CI25E compared to the documented *AFT1*-dependent activated genes taken from <sup>31</sup> and <sup>47</sup> and compared with other conditions previously published.

| From de Freitas <i>et al.</i><br>Figure 2 and Table 1 in JBC<br>(2004) |                   | From Philpott &<br>Protchenko Table 1 in<br>Euk.Cell (2008) |                   | Alkim <i>et al.</i> | Li <i>et al.</i> , 2004 | Stadler and Schweyen, 2002 |                      |                       |                      | de Freitas <i>et al.</i> , 2004 | Hausmann <i>et al.</i> ,<br>2008 |       |    | Puig <i>et al.</i> , 2005 |      |      |      |      |          | Veatch <i>et al.</i> , 2009 |                            |       |                               |                                  |                                                         | Ojeda <i>et al.</i> ,<br>2006 | Foury <i>et al.</i> ,<br>2001 | Shakoury-Elizeh <i>et al.</i> , 2004 |  |  |
|------------------------------------------------------------------------|-------------------|-------------------------------------------------------------|-------------------|---------------------|-------------------------|----------------------------|----------------------|-----------------------|----------------------|---------------------------------|----------------------------------|-------|----|---------------------------|------|------|------|------|----------|-----------------------------|----------------------------|-------|-------------------------------|----------------------------------|---------------------------------------------------------|-------------------------------|-------------------------------|--------------------------------------|--|--|
| systematic<br>name                                                     | Gene name         | systematic<br>name                                          | Gene name         | evolved<br>strain   | mrs3Δmrs4Δ              | 30 min;<br>100 μM<br>CoCL2 | 30 min: 2<br>mMCoCl2 | 90 min: 2<br>mM CoCl2 | 90 min, 80<br>μM BPS | mac1Δ                           | atm1Δ                            | yah1Δ | wt | cth2Δ                     | 3h   | 11h  | 19h  | 27h  | ATP1-111 | NAR1                        | grx3Δgrx4Δ<br>0,2 mM FeCl3 | yfh1Δ | AFT1 <sup>UP</sup> vs.<br>W/T | AFT1 <sup>UP</sup> vs.<br>aft1 Δ | 20 μM Fe vs. 100 μM Fe<br>iron-poor vs. iron-sufficient |                               |                               |                                      |  |  |
| <b>Copper and iron homeostasis/Homeostasis to metal ions</b>           |                   | <b>Uptake of iron at the cell surface</b>                   |                   |                     |                         |                            |                      |                       |                      |                                 |                                  |       |    |                           |      |      |      |      |          |                             |                            |       |                               |                                  |                                                         |                               |                               |                                      |  |  |
| YDR534C                                                                | <i>FIT1</i>       | YDR534C                                                     | <i>FIT1</i>       |                     |                         |                            | UP                   | UP                    |                      | UP                              | UP                               | UP    | UP | UP                        | UP   | UP   | UP   | UP   | DOWN     |                             | UP                         | UP    | UP                            | UP                               |                                                         |                               |                               |                                      |  |  |
| YOR382W                                                                | <i>FIT2</i>       | YOR382W                                                     | <i>FIT2</i>       | UP                  | UP                      | UP                         | UP                   | UP                    | UP                   | UP                              | UP                               | UP    | UP | UP                        | UP   | UP   | UP   | UP   | UP       | DOWN                        | UP                         | UP    | UP                            | UP                               | UP                                                      |                               |                               |                                      |  |  |
| YOR383C                                                                | <i>FIT3</i>       | YOR383C                                                     | <i>FIT3</i>       | UP                  | UP                      | UP                         | UP                   | UP                    | UP                   | UP                              | UP                               | UP    | UP | UP                        | UP   | UP   | UP   | UP   | UP       | DOWN                        | UP                         | UP    | UP                            | UP                               | UP                                                      |                               |                               |                                      |  |  |
| YLR214W                                                                | <i>FRE1</i>       | YLR214W                                                     | <i>FRE1</i>       | UP                  | UP                      |                            |                      |                       |                      | DOWN                            | UP                               | UP    | UP |                           | UP   | UP   | UP   | UP   |          |                             |                            | UP    | UP                            | UP                               |                                                         |                               |                               |                                      |  |  |
| YKL220C                                                                | <i>FRE2</i>       | YKL220C                                                     | <i>FRE2</i>       | UP                  |                         |                            |                      |                       |                      | UP                              | UP                               | UP    |    |                           |      |      |      |      |          |                             |                            | UP    | UP                            | UP                               | UP                                                      |                               |                               |                                      |  |  |
| YOR381W                                                                | <i>FRE3</i>       | YOR381W                                                     | <i>FRE3</i>       | UP                  | UP                      |                            |                      |                       |                      | UP                              | UP                               | UP    | UP |                           |      | UP   | UP   | UP   | UP       | DOWN                        |                            | UP    | DOWN                          | UP                               | UP                                                      |                               |                               |                                      |  |  |
| YNR060W                                                                | <i>FRE4</i>       | YNR060W                                                     | <i>FRE4</i>       |                     |                         |                            |                      |                       |                      | DOWN                            |                                  |       |    |                           |      |      |      |      |          |                             |                            |       | UP                            | UP                               | DOWN                                                    |                               |                               |                                      |  |  |
| YOR384W                                                                | <i>FRE5</i>       | YOR384W                                                     | <i>FRE5</i>       |                     |                         |                            |                      |                       |                      | UP                              | UP                               | UP    |    |                           |      |      |      |      |          |                             |                            | UP    | UP                            | UP                               |                                                         |                               |                               |                                      |  |  |
| YMR058W                                                                | <i>FET3</i>       | YMR058W                                                     | <i>FET3</i>       | UP                  | UP                      | UP                         | UP                   | UP                    |                      | UP                              | UP                               | UP    | UP |                           | UP   | UP   | UP   | UP   | UP       |                             | UP                         | UP    | UP                            | UP                               | UP                                                      |                               |                               |                                      |  |  |
| YER145C                                                                | <i>FTR1</i>       | YER145C                                                     | <i>FTR1</i>       | UP                  | UP                      |                            | UP                   | UP                    |                      | UP                              | UP                               | UP    | UP |                           | UP   | UP   | UP   | UP   | UP       | DOWN                        |                            | UP    | UP                            | UP                               | UP                                                      |                               |                               |                                      |  |  |
| YNL259C                                                                | <i>ATX1</i>       | YNL259C                                                     | <i>ATX1</i>       |                     |                         |                            |                      |                       |                      | UP                              | UP                               |       |    |                           | UP   | UP   | UP   | UP   | UP       |                             |                            | UP    | UP                            | UP                               | UP                                                      |                               |                               |                                      |  |  |
| YDR270W                                                                | <i>CCC2</i>       | YDR270W                                                     | <i>CCC2</i>       | UP                  | UP                      |                            |                      |                       |                      | UP                              | UP                               | UP    | UP |                           | UP   | UP   | UP   | UP   | UP       | DOWN                        |                            | UP    | UP                            | UP                               |                                                         |                               |                               |                                      |  |  |
| YHL040C                                                                | <i>ARN1</i>       | YHL040C                                                     | <i>ARN1</i>       | UP                  | UP                      | UP                         | UP                   | UP                    | UP                   | UP                              | UP                               | UP    | UP |                           | UP   | UP   | UP   | UP   | UP       | UP                          | UP                         | UP    | UP                            | UP                               | UP                                                      |                               |                               |                                      |  |  |
| YHL047C                                                                | <i>ARN2/TAF1</i>  | YHL047C                                                     | <i>ARN2/TAF1</i>  |                     | UP                      | UP                         | UP                   | UP                    |                      | UP                              | UP                               | UP    | UP |                           | UP   | UP   | UP   | UP   | UP       | DOWN                        |                            | UP    | UP                            | UP                               | UP                                                      |                               |                               |                                      |  |  |
| YEL065W                                                                | <i>ARN3/SIT1</i>  | YEL065W                                                     | <i>ARN3/SIT1</i>  | UP                  | UP                      |                            |                      |                       |                      | UP                              | UP                               | UP    | UP |                           | UP   | UP   | UP   | UP   | UP       | DOWN                        | UP                         | UP    | DOWN                          | UP                               | UP                                                      |                               |                               |                                      |  |  |
| YOL158C                                                                | <i>ARN4/ENB1</i>  | YOL158C                                                     | <i>ARN4/ENB1</i>  | UP                  | UP                      | UP                         | UP                   | UP                    | UP                   | UP                              | UP                               | UP    | UP |                           | UP   | UP   | UP   | UP   | UP       | DOWN                        | UP                         | UP    | UP                            | UP                               | UP                                                      |                               |                               |                                      |  |  |
| YOR264c                                                                | <i>AKR1</i>       |                                                             |                   | UP                  |                         |                            |                      | UP                    |                      | UP                              | UP                               | UP    |    |                           |      |      |      |      |          |                             |                            | UP    | UP                            | UP                               | UP                                                      |                               |                               |                                      |  |  |
| YGL047c                                                                | <i>AFT1</i>       |                                                             |                   | UP                  |                         |                            |                      |                       |                      | UP                              |                                  |       |    |                           |      |      |      |      |          |                             |                            |       |                               |                                  |                                                         |                               |                               |                                      |  |  |
| YPR124w                                                                | <i>CTR1</i>       |                                                             |                   | UP                  |                         |                            |                      |                       |                      |                                 |                                  |       |    |                           |      |      |      |      |          |                             |                            |       |                               |                                  |                                                         |                               |                               |                                      |  |  |
| YHR175w                                                                | <i>CTR2</i>       |                                                             |                   |                     |                         |                            |                      |                       |                      |                                 |                                  |       |    |                           |      |      |      |      |          |                             |                            |       |                               |                                  |                                                         |                               |                               |                                      |  |  |
| YLR411w                                                                | <i>CTR3</i>       |                                                             |                   |                     |                         |                            |                      |                       |                      |                                 |                                  |       |    |                           |      |      |      |      |          |                             |                            |       |                               |                                  |                                                         |                               |                               |                                      |  |  |
| YMR319c                                                                | <i>FET4</i>       |                                                             |                   | DOWN                |                         |                            |                      |                       |                      | DOWN                            | UP                               | UP    |    |                           |      |      |      |      |          |                             |                            |       |                               |                                  | UP                                                      |                               |                               |                                      |  |  |
| YOR176w                                                                | <i>HEM15</i>      |                                                             |                   | DOWN                |                         |                            |                      |                       |                      | DOWN                            | DOWN                             | DOWN  | UP |                           | DOWN | DOWN | DOWN | DOWN | DOWN     | DOWN                        |                            |       |                               |                                  | DOWN                                                    |                               |                               |                                      |  |  |
| YMR021c                                                                | <i>MAC1</i>       |                                                             |                   |                     |                         |                            |                      |                       |                      |                                 |                                  |       |    |                           |      |      |      |      |          |                             |                            |       |                               |                                  |                                                         |                               |                               |                                      |  |  |
| YBR295w                                                                | <i>PCA1</i>       |                                                             |                   | UP                  |                         |                            |                      |                       |                      | UP                              |                                  |       |    |                           |      |      |      |      |          |                             |                            |       |                               |                                  |                                                         |                               |                               |                                      |  |  |
| YLR221w                                                                | <i>CCC1</i>       |                                                             |                   | DOWN                |                         |                            |                      |                       |                      | DOWN                            | DOWN                             | DOWN  | UP |                           |      |      |      |      |          |                             |                            |       |                               |                                  |                                                         |                               |                               |                                      |  |  |
| YDR423c                                                                | <i>CAD1/YAP2</i>  |                                                             |                   |                     |                         |                            |                      |                       |                      | UP                              |                                  |       | UP |                           |      |      |      |      |          |                             | UP                         |       |                               |                                  |                                                         |                               |                               |                                      |  |  |
| YKL175w                                                                | <i>ZRT3</i>       |                                                             |                   | UP                  |                         |                            |                      |                       |                      | UP                              |                                  |       |    |                           |      |      |      |      |          |                             |                            |       |                               |                                  |                                                         |                               |                               |                                      |  |  |
| YOL152w                                                                | <i>FRE7</i>       |                                                             |                   | UP                  |                         |                            |                      |                       |                      | UP                              |                                  |       |    |                           |      |      |      |      |          |                             |                            |       |                               |                                  |                                                         |                               |                               |                                      |  |  |
|                                                                        |                   | <b>Efflux of iron from vacuole to cytosol</b>               |                   |                     |                         |                            |                      |                       |                      |                                 |                                  |       |    |                           |      |      |      |      |          |                             |                            |       |                               |                                  |                                                         |                               |                               |                                      |  |  |
|                                                                        |                   | YLL051C                                                     | <i>FRE6</i>       | UP                  |                         |                            |                      |                       |                      |                                 |                                  |       | UP |                           | UP   | UP   | UP   | UP   | UP       | UP                          |                            |       | UP                            | UP                               | UP                                                      |                               |                               |                                      |  |  |
|                                                                        |                   | YLR034C                                                     | <i>SMF3</i>       | UP                  |                         |                            |                      |                       |                      |                                 | UP                               |       |    |                           |      |      |      |      |          |                             |                            |       | UP                            | UP                               | UP                                                      |                               |                               |                                      |  |  |
| YFL041W                                                                | <i>FET5</i>       | YFL041W                                                     | <i>FET5</i>       | UP                  |                         |                            |                      |                       | UP                   | UP                              | UP                               | UP    | UP |                           | UP   | UP   | UP   | UP   | UP       | DOWN                        |                            | UP    | UP                            | UP                               |                                                         |                               |                               |                                      |  |  |
|                                                                        |                   | YBR207W                                                     | <i>FTH1</i>       | UP                  |                         |                            |                      |                       |                      | UP                              |                                  |       | UP |                           |      | UP   | UP   | UP   | UP       | DOWN                        |                            | UP    | UP                            | UP                               | UP                                                      |                               |                               |                                      |  |  |
|                                                                        |                   | <b>Other transporters</b>                                   |                   |                     |                         |                            |                      |                       |                      |                                 |                                  |       |    |                           |      |      |      |      |          |                             |                            |       |                               |                                  |                                                         |                               |                               |                                      |  |  |
|                                                                        |                   | YGR065C                                                     | <i>VHT1</i>       | UP                  |                         |                            |                      |                       |                      |                                 | UP                               |       |    |                           |      |      |      |      |          |                             |                            |       | UP                            | UP                               | UP                                                      |                               |                               |                                      |  |  |
| YOR316C                                                                | <i>COT1</i>       | YOR316C                                                     | <i>COT1</i>       | UP                  | UP                      |                            | UP                   |                       |                      | UP                              |                                  | UP    |    |                           |      |      |      |      |          |                             |                            | UP    | UP                            | UP                               | UP                                                      |                               |                               |                                      |  |  |
| YKR052C                                                                | <i>MRS4</i>       | YKR052C                                                     | <i>MRS4</i>       |                     |                         |                            |                      |                       |                      | UP                              |                                  |       |    |                           |      |      |      |      |          |                             |                            | UP    | UP                            | UP                               | UP                                                      |                               |                               |                                      |  |  |
|                                                                        |                   | <b>Metabolic adaptation to low iron</b>                     |                   |                     |                         |                            |                      |                       |                      |                                 |                                  |       |    |                           |      |      |      |      |          |                             |                            |       |                               |                                  |                                                         |                               |                               |                                      |  |  |
|                                                                        |                   | YLR205C                                                     | <i>HMX1</i>       | UP                  |                         |                            |                      | UP                    |                      | UP                              | UP                               | UP    | UP | UP                        |      | DOWN |      |      | UP       |                             |                            | UP    | UP                            | UP                               | UP                                                      |                               |                               |                                      |  |  |
| YLR136C                                                                | <i>CTH2/TIS11</i> | YLR136C                                                     | <i>CTH2/TIS11</i> | UP                  |                         | UP                         | UP                   |                       |                      | UP                              | UP                               | UP    | UP | UP                        | UP   | UP   | UP   | UP   | UP       | DOWN                        | UP                         | UP    | UP                            | UP                               | UP                                                      |                               |                               |                                      |  |  |
